# Supplementary material for: Veterinarians as a Risk Group for Zoonoses: Exposure, Knowledge and Protective Practices in Finland
Source: PubMed Central journal article supplement (PMC9346934; doi:10.1016/j.shaw.2021.10.008), 2021-11-09
Supplement: mmc1.pdf [file mmc1.pdf]

## **Supplementary material**

Supplementary Table 1. Protective practices in connection with bovine general examination as reported in 2009 by veterinarians in Finland (N=191)

Supplementary Table 2. Protective practices in connection with general examination of dogs and cats as reported in 2009 by veterinarians in Finland (N=249)

Supplementary Table 3. Protective practices in connection with general examination of horses as reported in 2009 by veterinarians in Finland (N=181)

Supplementary Table 4. Protective practices in connection with general examination of reptiles as reported in 2009 by veterinarians in Finland (N=88)

Supplementary Table 5. Protective practices in connection with the examination of swine with erysipelas as reported in 2009 by veterinarians in Finland (N=125)

Supplementary Table 6. Protective practices in connection with the examination of teat vesicles in cows as reported in 2009 by veterinarians in Finland (N=159)

Supplementary Table 7. Protective practices in connection with the examination of reindeer's oral cavity as reported in 2009 by veterinarians in Finland (N=20)

Supplementary Table 8. Protective practices in connection with investigation of the oral cavity of dog or cat as reported in 2009 by veterinarians in Finland (N=240)

Supplementary Table 9. Protective practices when taking fecal samples from cattle as reported in 2009 by veterinarians in Finland (N=172)

Supplementary Table 10. Protective practices in connection with calving assistance as reported in 2009 by veterinarians in Finland (N=183)

Supplementary Table 11. Protective practices in connection with general examination of cage birds as reported in 2009 by veterinarians in Finland (N=101)

Supplementary Table 12. Protective practices in connection with the removal of dental calculus from dogs or cats as reported in 2009 by veterinarians in Finland (N=234)

Supplementary Table 1. Protective practices in connection with bovine general examination as reported in 2009 by veterinarians in Finland (N=191)

|                                      | Always |      |           | Sometimes |      |           | Never |      |           |
|--------------------------------------|--------|------|-----------|-----------|------|-----------|-------|------|-----------|
|                                      | n      | %    | 95 % CI   | n         | %    | 95% CI    | n     | %    | 95% CI    |
| <b>Washing hands with water only</b> | 106    | 55.5 | 48.4–62.4 | 17        | 8.9  | 5.6–13.8  | 68    | 35.6 | 29.2–42.6 |
| <b>Washing hands with soap</b>       | 118    | 61.8 | 54.7–68.4 | 46        | 24.1 | 18.6–30.6 | 27    | 14.1 | 9.9–19.8  |
| <b>Hand sanitizer</b>                | 11     | 5.8  | 3.3–10.0  | 79        | 41.4 | 34.6–48.5 | 101   | 52.9 | 45.8–59.8 |
| <b>Examination gloves</b>            | 5      | 2.6  | 1.1–6.0   | 79        | 41.4 | 34.6–48.5 | 107   | 56.0 | 48.9–62.9 |
| <b>Shoulder-length gloves</b>        | 24     | 12.6 | 8.6–18.0  | 47        | 24.6 | 19.0–31.2 | 120   | 62.8 | 55.8–69.4 |
| <b>Work coat or similar</b>          | 174    | 91.1 | 86.2–94.4 | 14        | 7.3  | 4.4–11.9  | 3     | 1.6  | 0.5–4.5   |
| <b>Waterproof apron</b>              | 4      | 2.1  | 0.8–5.3   | 68        | 35.6 | 29.2–42.6 | 119   | 62.3 | 55.3–68.9 |
| <b>Headgear</b>                      | 29     | 15.2 | 10.8–21.0 | 58        | 30.4 | 24.3–37.2 | 104   | 54.5 | 47.4–61.4 |
| <b>Surgical mask</b>                 | 0      | 0.0  | 0.0–2.0   | 18        | 9.4  | 6.0–14.4  | 173   | 90.6 | 85.6–94.0 |
| <b>Particulate respirator</b>        | 0      | 0.0  | 0.0–2.0   | 9         | 4.7  | 2.5–8.7   | 182   | 95.3 | 91.3–97.5 |
| <b>Eye protection</b>                | 0      | 0.0  | 0.0–2.0   | 7         | 3.7  | 1.8–7.4   | 184   | 96.3 | 92.6–98.2 |

CI, Confidence interval; n, number of participants choosing each option.

Supplementary Table 2. Protective practices in connection with general examination of dogs and cats as reported in 2009 by veterinarians in Finland (N=249)

|                                      | Always |      |           | Sometimes |      |           | Never |      |           |
|--------------------------------------|--------|------|-----------|-----------|------|-----------|-------|------|-----------|
|                                      | n      | %    | 95 % CI   | n         | %    | 95% CI    | n     | %    | 95% CI    |
| <b>Washing hands with water only</b> | 103    | 41.4 | 35.4–47.6 | 29        | 11.7 | 8.2–16.2  | 117   | 47.0 | 40.9–53.2 |
| <b>Washing hands with soap</b>       | 153    | 61.5 | 55.3–67.3 | 60        | 24.1 | 19.2–29.8 | 36    | 14.5 | 10.6–19.4 |
| <b>Hand sanitizer</b>                | 77     | 30.9 | 25.5–36.9 | 88        | 35.3 | 29.7–41.5 | 84    | 33.7 | 28.2–39.8 |
| <b>Examination gloves</b>            | 6      | 2.4  | 1.1–5.2   | 88        | 35.3 | 29.7–41.5 | 155   | 62.3 | 56.1–68.0 |
| <b>Shoulder-length gloves</b>        | 5      | 2.0  | 0.9–4.6   | 7         | 2.8  | 1.4–5.7   | 237   | 95.2 | 91.8–97.2 |
| <b>Work coat or similar</b>          | 170    | 68.3 | 62.3–73.7 | 52        | 20.9 | 16.3–26.4 | 27    | 10.8 | 7.6–15.3  |
| <b>Waterproof apron</b>              | 0      | 0.0  | 0.0–1.5   | 21        | 8.4  | 5.6–12.6  | 228   | 91.6 | 87.5–94.4 |
| <b>Headgear</b>                      | 3      | 1.2  | 0.4–3.5   | 23        | 9.2  | 6.2–13.5  | 223   | 89.6 | 85.1–92.8 |
| <b>Surgical mask</b>                 | 0      | 0.0  | 0.0–1.5   | 11        | 4.4  | 2.5–7.7   | 238   | 95.6 | 92.3–97.5 |
| <b>Particulate respirator</b>        | 0      | 0.0  | 0.0–1.5   | 10        | 4.0  | 2.2–7.2   | 239   | 96.0 | 92.8–97.8 |
| <b>Eye protection</b>                | 2      | 0.8  | 0.2–2.9   | 5         | 2.0  | 0.9–4.6   | 242   | 97.2 | 94.3–98.6 |

CI, Confidence interval; n, number of participants choosing each option.

Supplementary Table 3. Protective practices in connection with general examination of horses as reported in 2009 by veterinarians in Finland (N=181)

|                                      | Always |      |           | Sometimes |      |           | Never |      |           |
|--------------------------------------|--------|------|-----------|-----------|------|-----------|-------|------|-----------|
|                                      | n      | %    | 95 % CI   | n         | %    | 95% CI    | n     | %    | 95% CI    |
| <b>Washing hands with water only</b> | 80     | 44.2 | 37.2–51.5 | 27        | 14.9 | 10.5–20.8 | 74    | 40.9 | 34.0–48.2 |
| <b>Washing hands with soap</b>       | 93     | 51.4 | 44.2–58.6 | 57        | 31.5 | 25.2–38.6 | 31    | 17.1 | 12.3–23.3 |
| <b>Hand sanitizer</b>                | 12     | 6.6  | 3.8–11.2  | 49        | 27.1 | 21.1–34.0 | 120   | 66.3 | 59.1–72.8 |
| <b>Examination gloves</b>            | 2      | 1.1  | 0.3–3.9   | 31        | 17.1 | 12.3–23.3 | 148   | 81.8 | 75.5–86.7 |
| <b>Shoulder-length gloves</b>        | 1      | 0.5  | 0.1–3.1   | 12        | 6.6  | 3.8–11.2  | 168   | 92.8 | 88.1–95.8 |
| <b>Work coat or similar</b>          | 94     | 51.9 | 44.7–59.1 | 72        | 39.8 | 32.9–47.1 | 15    | 8.3  | 5.1–13.2  |
| <b>Waterproof apron</b>              | 1      | 0.5  | 0.1–3.1   | 19        | 10.5 | 6.8–15.8  | 161   | 89.0 | 83.6–92.7 |
| <b>Headgear</b>                      | 14     | 7.7  | 4.7–12.6  | 33        | 18.2 | 13.3–24.5 | 134   | 74.0 | 67.2–79.9 |
| <b>Surgical mask</b>                 | 0      | 0.0  | 0.0–2.1   | 5         | 2.8  | 1.2–6.3   | 176   | 97.2 | 93.7–98.8 |
| <b>Particulate respirator</b>        | 0      | 0.0  | 0.0–2.1   | 4         | 2.2  | 0.9–5.5   | 177   | 97.8 | 94.5–99.1 |
| <b>Eye protection</b>                | 0      | 0.0  | 0.0–2.1   | 2         | 1.1  | 0.3–3.9   | 179   | 98.9 | 96.1–99.7 |

CI, Confidence interval; n, number of participants choosing each option.

Supplementary Table 4. Protective practices in connection with general examination of reptiles as reported in 2009 by veterinarians in Finland (N=88)

|                                      | Always |      |           | Sometimes |      |           | Never |      |           |
|--------------------------------------|--------|------|-----------|-----------|------|-----------|-------|------|-----------|
|                                      | n      | %    | 95 % CI   | n         | %    | 95% CI    | n     | %    | 95% CI    |
| <b>Washing hands with water only</b> | 40     | 45.5 | 35.5–55.8 | 1         | 1.1  | 0.2–6.2   | 47    | 53.4 | 43.1–63.5 |
| <b>Washing hands with soap</b>       | 77     | 87.5 | 79.0–92.9 | 3         | 3.4  | 1.2–9.6   | 8     | 9.1  | 4.7–16.9  |
| <b>Hand sanitizer</b>                | 52     | 59.1 | 48.7–68.8 | 18        | 20.5 | 13.4–30.0 | 18    | 20.5 | 13.4–30.0 |
| <b>Examination gloves</b>            | 24     | 27.3 | 19.1–37.4 | 30        | 34.1 | 25.0–44.5 | 34    | 38.6 | 29.1–49.1 |
| <b>Shoulder-length gloves</b>        | 0      | 0.0  | 0.0–4.2   | 1         | 1.1  | 0.2–6.2   | 87    | 98.9 | 93.8–99.8 |
| <b>Work coat or similar</b>          | 66     | 75.0 | 65.0–82.9 | 14        | 15.9 | 9.7–25.0  | 8     | 9.1  | 4.7–16.9  |
| <b>Waterproof apron</b>              | 0      | 0.0  | 0.0–4.2   | 5         | 5.7  | 2.5–12.6  | 83    | 94.3 | 87.4–97.6 |
| <b>Headgear</b>                      | 0      | 0.0  | 0.0–4.2   | 5         | 5.7  | 2.5–12.6  | 83    | 94.3 | 87.4–97.6 |
| <b>Surgical mask</b>                 | 0      | 0.0  | 0.0–4.2   | 5         | 5.7  | 2.5–12.6  | 83    | 94.3 | 87.4–97.6 |
| <b>Particulate respirator</b>        | 0      | 0.0  | 0.0–4.2   | 3         | 3.4  | 1.2–9.6   | 85    | 96.6 | 90.5–98.8 |
| <b>Eye protection</b>                | 0      | 0.0  | 0.0–4.2   | 2         | 2.3  | 0.6–7.9   | 86    | 97.7 | 92.1–99.4 |

CI, Confidence interval; n, number of participants choosing each option.

Supplementary Table 5. Protective practices in connection with the examination of swine with erysipelas as reported in 2009 by veterinarians in Finland (N=125)

|                                      | Always |      |           | Sometimes |      |           | Never |      |           |
|--------------------------------------|--------|------|-----------|-----------|------|-----------|-------|------|-----------|
|                                      | n      | %    | 95 % CI   | n         | %    | 95% CI    | n     | %    | 95% CI    |
| <b>Washing hands with water only</b> | 55     | 44.0 | 35.6–52.8 | 4         | 3.2  | 1.3–7.9   | 66    | 52.8 | 44.1–61.3 |
| <b>Washing hands with soap</b>       | 94     | 75.2 | 67.0–81.9 | 13        | 10.4 | 6.2–17.0  | 18    | 14.4 | 9.3–21.6  |
| <b>Hand sanitizer</b>                | 23     | 18.4 | 12.6–26.1 | 29        | 23.2 | 16.7–31.3 | 73    | 58.4 | 49.6–66.7 |
| <b>Examination gloves</b>            | 33     | 26.4 | 19.5–34.8 | 27        | 21.6 | 15.3–29.6 | 65    | 52.0 | 43.3–60.6 |
| <b>Shoulder-length gloves</b>        | 1      | 0.8  | 0.1–4.4   | 2         | 1.6  | 0.4–5.7   | 122   | 97.6 | 93.2–99.2 |
| <b>Work coat or similar</b>          | 123    | 98.4 | 94.4–99.6 | 1         | 0.8  | 0.1–4.4   | 1     | 0.8  | 0.1–4.4   |
| <b>Waterproof apron</b>              | 2      | 1.6  | 0.4–5.7   | 7         | 5.6  | 2.7–11.1  | 116   | 92.8 | 86.9–96.2 |
| <b>Headgear</b>                      | 37     | 29.6 | 22.3–38.1 | 21        | 16.8 | 11.3–24.3 | 67    | 53.6 | 44.9–62.1 |
| <b>Surgical mask</b>                 | 1      | 0.8  | 0.1–4.4   | 1         | 0.8  | 0.1–4.4   | 123   | 98.4 | 94.4–99.6 |
| <b>Particulate respirator</b>        | 4      | 3.2  | 1.3–7.9   | 10        | 8.0  | 4.4–14.1  | 111   | 88.8 | 82.1–93.2 |
| <b>Eye protection</b>                | 2      | 1.6  | 0.4–5.7   | 2         | 1.6  | 0.4–5.7   | 121   | 96.8 | 92.1–98.8 |

CI, Confidence interval; n, number of participants choosing each option.

Supplementary Table 6. Protective practices in connection with the examination of teat vesicles in cows as reported in 2009 by veterinarians in Finland (N=159)

|                                      | n   | Always |           | n  | Sometimes |           | n   | Never |           |
|--------------------------------------|-----|--------|-----------|----|-----------|-----------|-----|-------|-----------|
|                                      |     | %      | 95 % CI   |    | %         | 95% CI    |     | %     | 95% CI    |
| <b>Washing hands with water only</b> | 83  | 52.2   | 44.5–59.8 | 7  | 4.4       | 2.2–8.8   | 69  | 43.4  | 35.9–51.2 |
| <b>Washing hands with soap</b>       | 119 | 74.8   | 67.6–81.0 | 17 | 10.7      | 6.8–16.5  | 23  | 14.5  | 9.8–20.8  |
| <b>Hand sanitizer</b>                | 23  | 14.5   | 9.8–20.8  | 45 | 28.3      | 21.9–35.8 | 91  | 57.2  | 49.5–64.7 |
| <b>Examination gloves</b>            | 24  | 15.1   | 10.4–21.5 | 55 | 34.6      | 27.6–42.3 | 80  | 50.3  | 42.6–58.0 |
| <b>Shoulder-length gloves</b>        | 0   | 0.0    | 0.0–2.4   | 8  | 5.0       | 2.6–9.6   | 151 | 95.0  | 90.4–97.4 |
| <b>Work coat or similar</b>          | 144 | 90.6   | 85.0–94.2 | 7  | 4.4       | 2.2–8.8   | 8   | 5.0   | 2.6–9.6   |
| <b>Waterproof apron</b>              | 5   | 3.1    | 1.4–7.2   | 22 | 13.8      | 9.3–20.1  | 132 | 83.0  | 76.4–88.1 |
| <b>Headgear</b>                      | 23  | 14.5   | 9.8–20.8  | 33 | 20.8      | 15.2–27.7 | 103 | 64.8  | 57.1–71.8 |
| <b>Surgical mask</b>                 | 0   | 0.0    | 0.0–2.4   | 5  | 3.1       | 1.4–7.2   | 154 | 96.9  | 92.9–98.7 |
| <b>Particulate respirator</b>        | 0   | 0.0    | 0.0–2.4   | 4  | 2.5       | 1.0–6.3   | 155 | 97.5  | 93.7–99.0 |
| <b>Eye protection</b>                | 1   | 0.6    | 0.1–3.5   | 5  | 3.1       | 1.4–7.2   | 153 | 96.2  | 92.0–98.3 |

CI, Confidence interval; n, number of participants choosing each option.

Supplementary Table 7. Protective practices in connection with the examination of reindeer's oral cavity as reported in 2009 by veterinarians in Finland (N=20)

|                                      | Always |      |           | Sometimes |      |           | Never          |       |            |
|--------------------------------------|--------|------|-----------|-----------|------|-----------|----------------|-------|------------|
|                                      | n      | %    | 95 % CI   | n         | %    | 95% CI    | n <sup>a</sup> | %     | 95% CI     |
| <b>Washing hands with water only</b> | 9      | 45.0 | 25.8–65.8 | 4         | 20.0 | 8.1–41.6  | 7              | 35.0  | 18.1–56.7  |
| <b>Washing hands with soap</b>       | 14     | 70.0 | 48.1–85.5 | 5         | 25.0 | 11.2–46.9 | 1              | 5.0   | 0.9–23.6   |
| <b>Hand sanitizer</b>                | 3      | 15.0 | 5.2–36.0  | 8         | 40.0 | 21.9–61.3 | 9              | 45.0  | 25.8–65.8  |
| <b>Examination gloves</b>            | 4      | 20.0 | 8.1–41.6  | 10        | 50.0 | 29.9–70.1 | 6              | 30.0  | 14.6–51.9  |
| <b>Shoulder-length gloves</b>        | 0      | 0.0  | 0.0–16.1  | 0         | 0.0  | 0.0–16.1  | 20             | 100.0 | 83.9–100.0 |
| <b>Work coat or similar</b>          | 15     | 75.0 | 53.1–88.8 | 2         | 10.0 | 2.8–30.1  | 3              | 15.0  | 5.2–36.0   |
| <b>Waterproof apron</b>              | 0      | 0.0  | 0.0–16.1  | 0         | 0.0  | 0.0–16.1  | 20             | 100.0 | 83.9–100.0 |
| <b>Headgear</b>                      | 3      | 15.0 | 5.2–36.0  | 2         | 10.0 | 2.8–30.1  | 15             | 75.0  | 53.1–88.8  |
| <b>Surgical mask</b>                 | 0      | 0.0  | 0.0–16.1  | 0         | 0.0  | 0.0–16.1  | 20             | 100.0 | 83.9–100.0 |
| <b>Particulate respirator</b>        | 0      | 0.0  | 0.0–16.1  | 0         | 0.0  | 0.0–16.1  | 20             | 100.0 | 83.9–100.0 |
| <b>Eye protection</b>                | 0      | 0.0  | 0.0–16.1  | 0         | 0.0  | 0.0–16.1  | 20             | 100.0 | 83.9–100.0 |

CI, Confidence interval; n, number of participants choosing each option.



Supplementary Table 8. Protective practices in connection with investigation of the oral cavity of dog or cat as reported in 2009 by veterinarians in Finland (N=240)

|                                      | Always |      |           | Sometimes |      |           | Never |      |           |
|--------------------------------------|--------|------|-----------|-----------|------|-----------|-------|------|-----------|
|                                      | n      | %    | 95 % CI   | n         | %    | 95% CI    | n     | %    | 95% CI    |
| <b>Washing hands with water only</b> | 91     | 37.9 | 32.0–44.2 | 11        | 4.6  | 2.6–8.0   | 138   | 57.5 | 51.2–63.6 |
| <b>Washing hands with soap</b>       | 171    | 71.3 | 65.2–76.6 | 27        | 11.3 | 7.9–15.9  | 42    | 17.5 | 13.2–22.8 |
| <b>Hand sanitizer</b>                | 92     | 38.3 | 32.4–44.6 | 61        | 25.4 | 20.3–31.3 | 87    | 36.3 | 30.4–42.5 |
| <b>Examination gloves</b>            | 69     | 28.8 | 23.4–34.8 | 120       | 50.0 | 43.7–56.3 | 51    | 21.3 | 16.6–26.9 |
| <b>Shoulder-length gloves</b>        | 2      | 0.8  | 0.2–3.0   | 4         | 1.7  | 0.7–4.2   | 234   | 97.5 | 94.7–98.9 |
| <b>Work coat or similar</b>          | 172    | 71.7 | 65.7–77.0 | 39        | 16.3 | 12.1–21.4 | 29    | 12.1 | 8.6–16.8  |
| <b>Waterproof apron</b>              | 1      | 0.4  | 0.1–2.3   | 20        | 8.3  | 5.5–12.5  | 219   | 91.3 | 87.0–94.2 |
| <b>Headgear</b>                      | 4      | 1.7  | 0.7–4.2   | 20        | 8.3  | 5.5–12.5  | 216   | 90.0 | 85.6–93.2 |
| <b>Surgical mask</b>                 | 3      | 1.3  | 0.4–3.6   | 17        | 7.1  | 4.5–11.1  | 220   | 91.7 | 87.5–94.5 |
| <b>Particulate respirator</b>        | 1      | 0.4  | 0.1–2.3   | 9         | 3.8  | 2.0–7.0   | 230   | 95.8 | 92.5–97.7 |
| <b>Eye protection</b>                | 2      | 0.8  | 0.2–3.0   | 8         | 3.3  | 1.7–6.4   | 230   | 95.8 | 92.5–97.7 |

CI, Confidence interval; n, number of participants choosing each option.

Supplementary Table 9. Protective practices when taking fecal samples from cattle as reported in 2009 by veterinarians in Finland (N=172)

|                                      | Always |      |           | Sometimes |      |           | Never |      |           |
|--------------------------------------|--------|------|-----------|-----------|------|-----------|-------|------|-----------|
|                                      | n      | %    | 95 % CI   | n         | %    | 95% CI    | n     | %    | 95% CI    |
| <b>Washing hands with water only</b> | 86     | 50.0 | 42.6–57.4 | 7         | 4.1  | 2.0–8.2   | 79    | 45.9 | 38.7–53.4 |
| <b>Washing hands with soap</b>       | 131    | 76.2 | 69.3–81.9 | 15        | 8.7  | 5.4–13.9  | 26    | 15.1 | 10.5–21.2 |
| <b>Hand sanitizer</b>                | 21     | 12.2 | 8.1–17.9  | 48        | 27.9 | 21.7–35.0 | 103   | 59.9 | 52.4–66.9 |
| <b>Examination gloves</b>            | 56     | 32.6 | 26.0–39.9 | 26        | 15.1 | 10.5–21.2 | 90    | 52.3 | 44.9–59.7 |
| <b>Shoulder-length gloves</b>        | 114    | 66.3 | 58.9–72.9 | 18        | 10.5 | 6.7–15.9  | 40    | 23.3 | 17.6–30.1 |
| <b>Work coat or similar</b>          | 151    | 87.8 | 82.1–91.9 | 6         | 3.5  | 1.6–7.4   | 15    | 8.7  | 5.4–13.9  |
| <b>Waterproof apron</b>              | 23     | 13.4 | 9.1–19.3  | 41        | 23.8 | 18.1–30.7 | 108   | 62.8 | 55.4–69.7 |
| <b>Headgear</b>                      | 27     | 15.7 | 11.0–21.9 | 35        | 20.4 | 15.0–27.0 | 110   | 64.0 | 56.6–70.8 |
| <b>Surgical mask</b>                 | 0      | 0.0  | 0.0–2.2   | 7         | 4.1  | 2.0–8.2   | 165   | 95.9 | 91.8–98.0 |
| <b>Particulate respirator</b>        | 0      | 0.0  | 0.0–2.2   | 5         | 2.9  | 1.3–6.6   | 167   | 97.1 | 93.4–98.8 |
| <b>Eye protection</b>                | 1      | 0.6  | 0.1–3.2   | 5         | 2.9  | 1.3–6.6   | 166   | 96.5 | 92.6–98.4 |

CI, Confidence interval; n, number of participants choosing each option.

Supplementary Table 10. Protective practices in connection with calving assistance as reported in 2009 by veterinarians in Finland (N=183)

|                                      | Always |      |           | Sometimes |      |           | Never |      |           |
|--------------------------------------|--------|------|-----------|-----------|------|-----------|-------|------|-----------|
|                                      | n      | %    | 95 % CI   | n         | %    | 95% CI    | n     | %    | 95% CI    |
| <b>Washing hands with water only</b> | 96     | 52.5 | 45.3–59.6 | 8         | 4.4  | 2.2–8.4   | 79    | 43.2 | 36.2–50.4 |
| <b>Washing hands with soap</b>       | 148    | 80.9 | 74.6–85.9 | 11        | 6.0  | 3.4–10.4  | 24    | 13.1 | 9.0–18.8  |
| <b>Hand sanitizer</b>                | 42     | 23.0 | 17.5–29.6 | 50        | 27.3 | 21.4–34.2 | 91    | 49.7 | 42.6–56.9 |
| <b>Examination gloves</b>            | 13     | 7.1  | 4.2–11.8  | 39        | 21.3 | 16.0–27.8 | 131   | 71.6 | 64.7–77.6 |
| <b>Shoulder-length gloves</b>        | 18     | 9.8  | 6.3–15.0  | 82        | 44.8 | 37.8–52.1 | 83    | 45.4 | 38.3–52.6 |
| <b>Work coat or similar</b>          | 100    | 54.6 | 47.4–61.7 | 17        | 9.3  | 5.9–14.4  | 66    | 36.1 | 29.5–43.2 |
| <b>Waterproof apron</b>              | 145    | 79.2 | 72.8–84.5 | 23        | 12.6 | 8.5–18.2  | 15    | 8.2  | 5.0–13.1  |
| <b>Headgear</b>                      | 32     | 17.5 | 12.7–23.6 | 41        | 22.4 | 17.0–29.0 | 110   | 60.1 | 52.9–66.9 |
| <b>Surgical mask</b>                 | 0      | 0.0  | 0.0–2.1   | 6         | 3.3  | 1.5–7.0   | 177   | 96.7 | 93.0–98.5 |
| <b>Particulate respirator</b>        | 1      | 0.6  | 0.1–3.0   | 4         | 2.2  | 0.9–5.5   | 178   | 97.3 | 93.8–98.8 |
| <b>Eye protection</b>                | 1      | 0.6  | 0.1–3.0   | 5         | 2.7  | 1.2–6.2   | 177   | 96.7 | 93.0–98.5 |

CI, Confidence interval; n, number of participants choosing each option.

Supplementary Table 11. Protective practices in connection with general examination of cage birds as reported in 2009 by veterinarians in Finland (N=101)

|                                      | Always |      |           | Sometimes |      |           | Never |      |           |
|--------------------------------------|--------|------|-----------|-----------|------|-----------|-------|------|-----------|
|                                      | n      | %    | 95 % CI   | n         | %    | 95% CI    | n     | %    | 95% CI    |
| <b>Washing hands with water only</b> | 42     | 41.6 | 32.5–51.3 | 2         | 2.0  | 0.5–6.9   | 57    | 56.4 | 46.7–65.7 |
| <b>Washing hands with soap</b>       | 72     | 71.3 | 61.8–79.2 | 12        | 11.9 | 6.9–19.6  | 17    | 16.8 | 10.8–25.3 |
| <b>Hand sanitizer</b>                | 43     | 42.6 | 33.4–52.3 | 30        | 29.7 | 21.7–39.2 | 28    | 27.7 | 19.9–37.2 |
| <b>Examination gloves</b>            | 10     | 9.9  | 5.5–17.3  | 30        | 29.7 | 21.7–39.2 | 61    | 60.4 | 50.7–69.4 |
| <b>Shoulder-length gloves</b>        | 0      | 0.0  | 0.0–3.7   | 1         | 1.0  | 0.2–5.4   | 100   | 99.0 | 94.6–99.8 |
| <b>Work coat or similar</b>          | 75     | 74.3 | 65.0–81.8 | 17        | 16.8 | 10.8–25.3 | 9     | 8.9  | 4.8–16.1  |
| <b>Waterproof apron</b>              | 0      | 0.0  | 0.0–3.7   | 4         | 4.0  | 1.6–9.7   | 97    | 96.0 | 90.3–98.5 |
| <b>Headgear</b>                      | 2      | 2.0  | 0.5–6.9   | 6         | 5.9  | 2.8–12.4  | 93    | 92.1 | 85.1–95.9 |
| <b>Surgical mask</b>                 | 0      | 0.0  | 0.0–3.7   | 4         | 4.0  | 1.6–9.7   | 97    | 96.0 | 90.3–98.5 |
| <b>Particulate respirator</b>        | 1      | 1.0  | 0.2–5.4   | 6         | 5.9  | 2.8–12.4  | 94    | 93.1 | 86.4–96.6 |
| <b>Eye protection</b>                | 1      | 1.0  | 0.2–5.4   | 5         | 5.0  | 2.1–11.1  | 95    | 94.1 | 87.6–97.3 |

CI, Confidence interval; n, number of participants choosing each option.

Supplementary Table 12. Protective practices in connection with the removal of dental calculus from dogs or cats as reported in 2009 by veterinarians in Finland (N=234)

|                                      | Always |      |           | Sometimes |      |           | Never |      |           |
|--------------------------------------|--------|------|-----------|-----------|------|-----------|-------|------|-----------|
|                                      | n      | %    | 95 % CI   | n         | %    | 95% CI    | n     | %    | 95% CI    |
| <b>Washing hands with water only</b> | 93     | 39.7 | 33.7–46.1 | 9         | 3.9  | 2.0–7.2   | 132   | 56.4 | 50.0–62.6 |
| <b>Washing hands with soap</b>       | 175    | 74.8 | 68.9–79.9 | 21        | 9.0  | 5.9–13.3  | 38    | 16.2 | 12.1–21.5 |
| <b>Hand sanitizer</b>                | 94     | 40.2 | 34.1–46.6 | 59        | 25.2 | 20.1–31.2 | 81    | 34.6 | 28.8–40.9 |
| <b>Examination gloves</b>            | 192    | 82.1 | 76.6–86.4 | 21        | 9.0  | 5.9–13.3  | 21    | 9.0  | 5.9–13.3  |
| <b>Shoulder-length gloves</b>        | 2      | 0.9  | 0.2–3.1   | 4         | 1.7  | 0.7–4.3   | 228   | 97.4 | 94.5–98.8 |
| <b>Work coat or similar</b>          | 172    | 73.5 | 67.5–78.8 | 29        | 12.4 | 8.8–17.2  | 33    | 14.1 | 10.2–19.1 |
| <b>Waterproof apron</b>              | 12     | 5.1  | 3.0–8.8   | 24        | 10.3 | 7.0–14.8  | 198   | 84.6 | 79.4–88.7 |
| <b>Headgear</b>                      | 24     | 10.3 | 7.0–14.8  | 36        | 15.4 | 11.3–20.6 | 174   | 74.4 | 68.4–79.5 |
| <b>Surgical mask</b>                 | 89     | 38.0 | 32.1–44.4 | 31        | 13.3 | 9.5–18.2  | 114   | 48.7 | 42.4–55.1 |
| <b>Particulate respirator</b>        | 31     | 13.3 | 9.5–18.2  | 13        | 5.6  | 3.3–9.3   | 190   | 81.2 | 75.7–85.7 |
| <b>Eye protection</b>                | 24     | 10.3 | 7.0–14.8  | 36        | 15.4 | 11.3–20.6 | 174   | 74.4 | 68.4–79.5 |

CI, Confidence interval; n, number of participants choosing each option.
